# Supplementary material for: High-performance, fluorescent, UV-shielding, triboelectric, super-flexible polyurea elastomers via strong π–π stacking of pyrene and hydrogen bonding strategies
Source: Royal Society of Chemistry journal article supplement (doi:10.1039/d3tc00963g), 2023-01-01
Supplement: d3tc00963g1.pdf [file d3tc00963g1.pdf]

## Supporting information

### **High-performance, fluorescent, UV-shielding, triboelectric, super-flexible polyurea elastomers via strong $\pi$ - $\pi$ stacking of pyrene and hydrogen bonding strategies**

Zheng Yuan<sup>1,a</sup>, Jun Yan<sup>1,a</sup>, Feng Gao<sup>a</sup>, Jue Cheng<sup>\*,a</sup>, Junying Zhang<sup>\*,a</sup>

<sup>a</sup>Key Laboratory of Carbon Fiber and Functional Polymers, Ministry of Education;  
Beijing University of Chemical Technology, Beijing 100029, China

<sup>1</sup> The two authors made equal contributions to this work.

\*Corresponding author. Tel. :+86 10 64425439; fax: +86 10 64425439

E-mail address: [chengjue@mail.buct.edu.cn](mailto:chengjue@mail.buct.edu.cn) (J. Cheng)

[zhangjy@mail.buct.edu.cn](mailto:zhangjy@mail.buct.edu.cn) (J. Zhang)

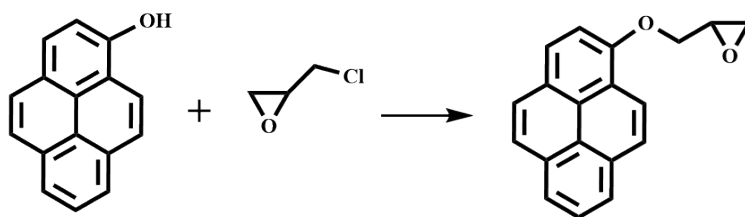

Figure S1. The synthetic route of PrGE

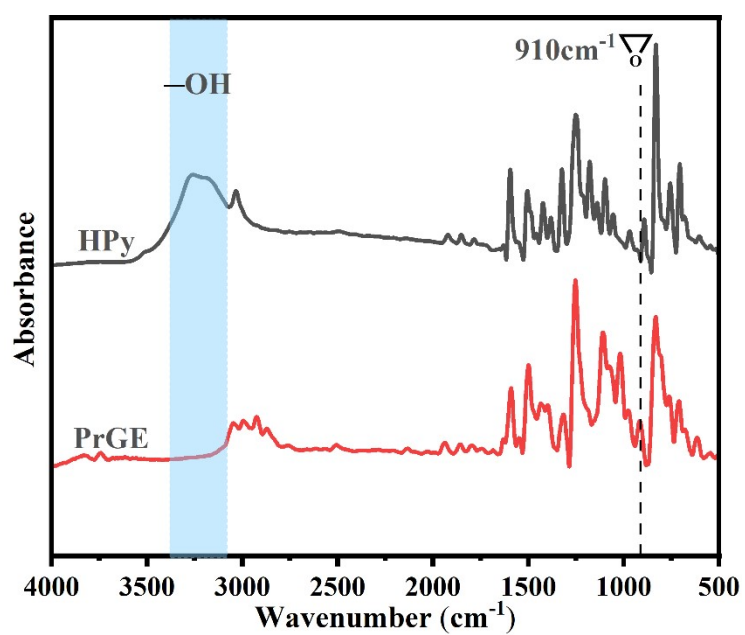

Figure S2. FTIR of the product PrGE and HPy

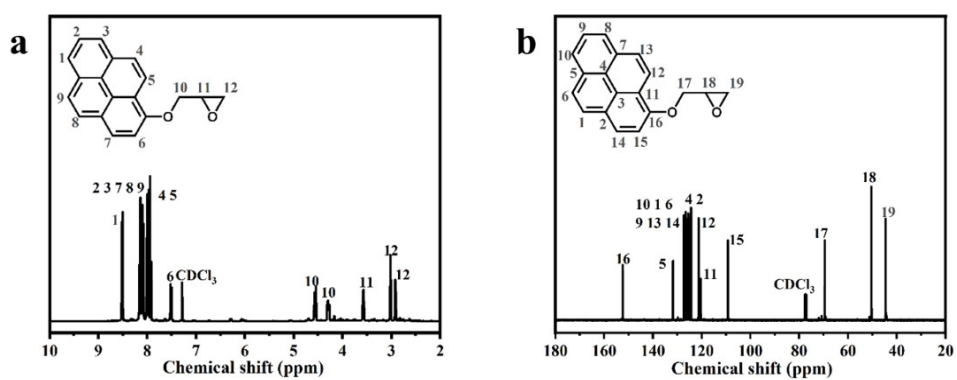

Figure S3. (a)  $^1\text{H}$  NMR of PrGE. (b)  $^{13}\text{C}$  NMR of PrGE

Table S1 Recipe list for PPU-x synthesis

|         | PrGE/mol | 2-Hydroxy-1-ethanethiol/mol | HMDI/mol | D2000/mol | D230/mol |
|---------|----------|-----------------------------|----------|-----------|----------|
| PPU-0.1 | 0.00125  | 0.00125                     | 0.01375  | 0.00625   | 0.00625  |
| PPU-0.2 | 0.0025   | 0.0025                      | 0.015    | 0.00625   | 0.00625  |
| PPU-0.3 | 0.00375  | 0.00375                     | 0.01625  | 0.00625   | 0.00625  |
| PPU-0.4 | 0.005    | 0.005                       | 0.0175   | 0.00625   | 0.00625  |

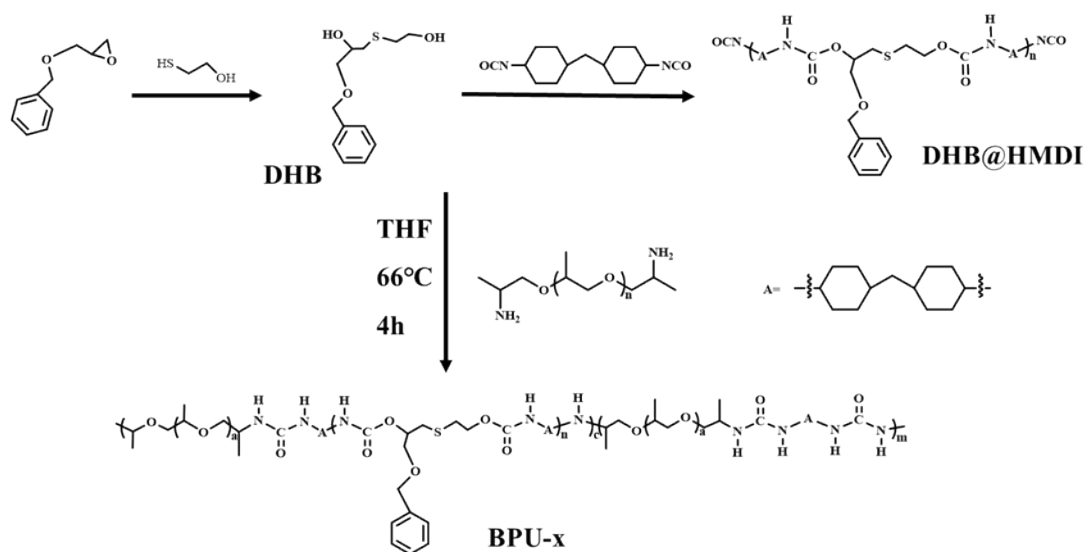

Figure S4. The synthetic route of BPU-x

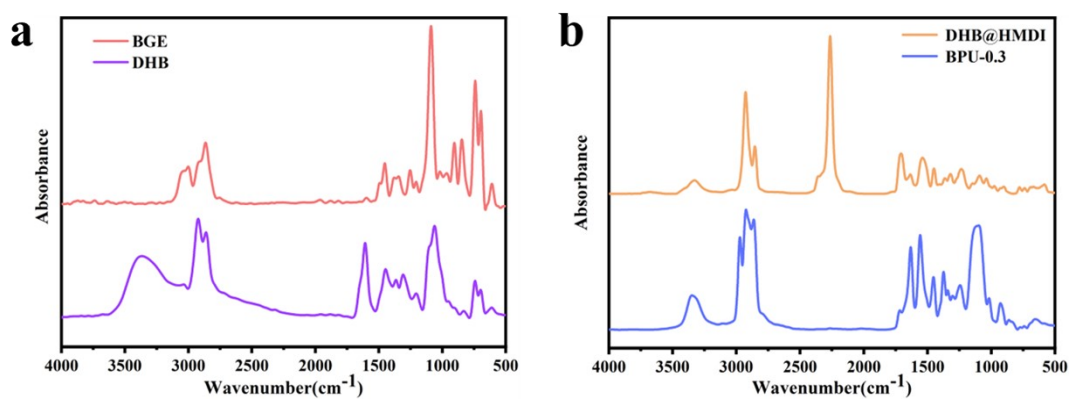

Figure S5. (a-b) FTIR image of corresponding product during BPU synthesis

Table S2 Recipe list for BPU-x and PU synthesis

|         | PrGE/mol | 2-Hydroxy-1-ethanethiol/mol | HMDI/mol | D2000/mol | D230/mol |
|---------|----------|-----------------------------|----------|-----------|----------|
| BPU-0.1 | 0.00125  | 0.00125                     | 0.01375  | 0.00625   | 0.00625  |
| BPU-0.2 | 0.0025   | 0.0025                      | 0.015    | 0.00625   | 0.00625  |
| BPU-0.3 | 0.00375  | 0.00375                     | 0.01625  | 0.00625   | 0.00625  |
| BPU-0.4 | 0.005    | 0.005                       | 0.0175   | 0.00625   | 0.00625  |
| PU      | 0        | 0                           | 0.0125   | 0.00625   | 0.00625  |

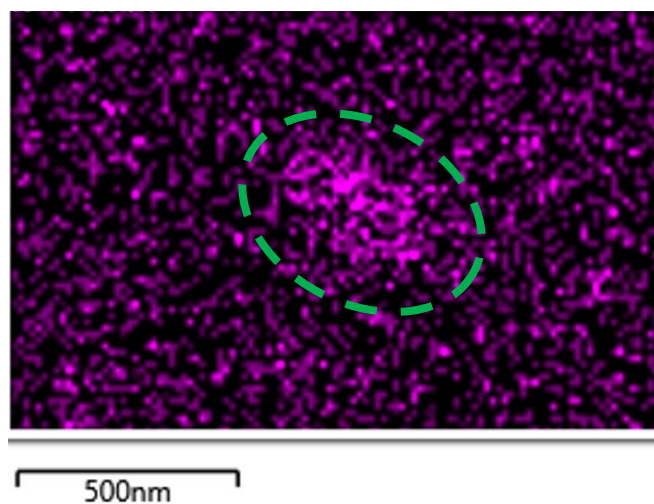

Figure S6. The EDS result of PPU-0.3

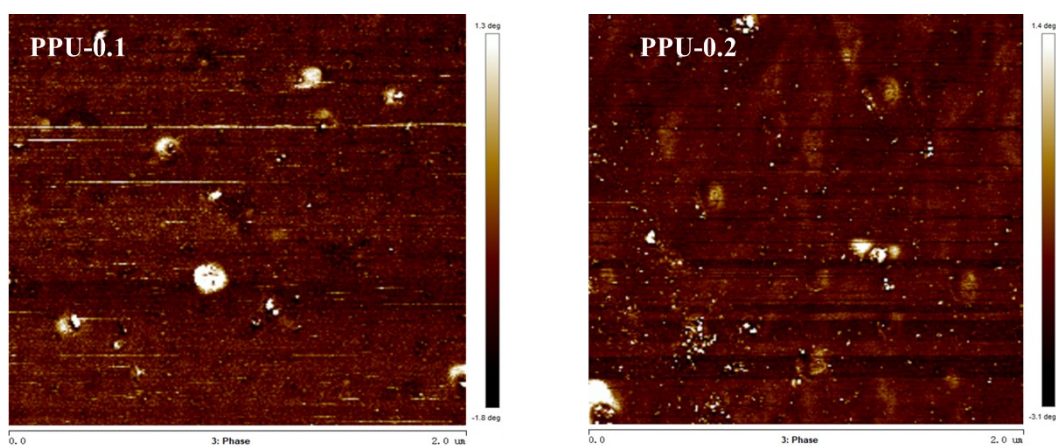

Figure S7. Phase diagram of AFM for PPU-0.1 and PPU-0.2

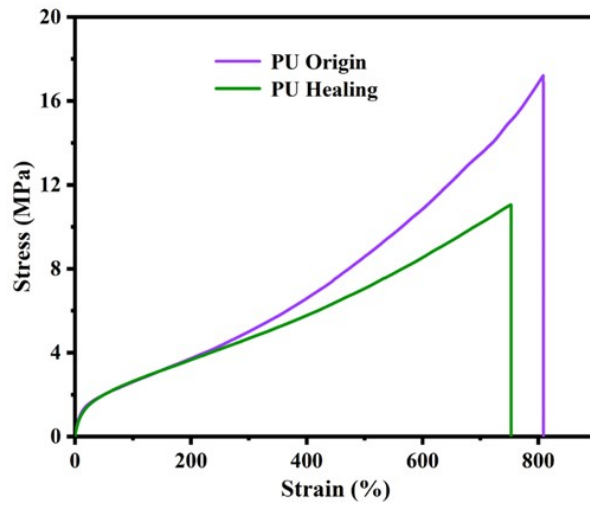

Figure S8. Stress-strain curves of PU before and after self-repair

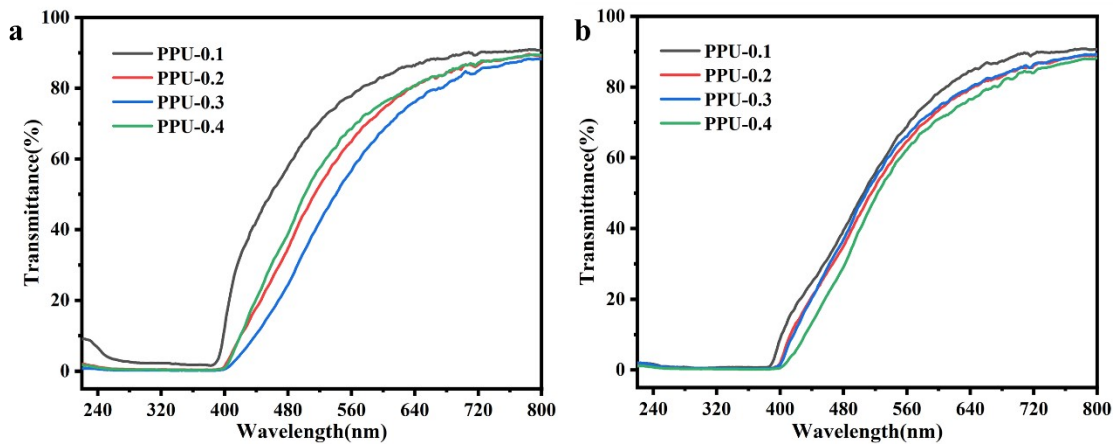

Figure S9. (a) After 50 hours of UV illumination. (b) After 100 hours of UV illumination

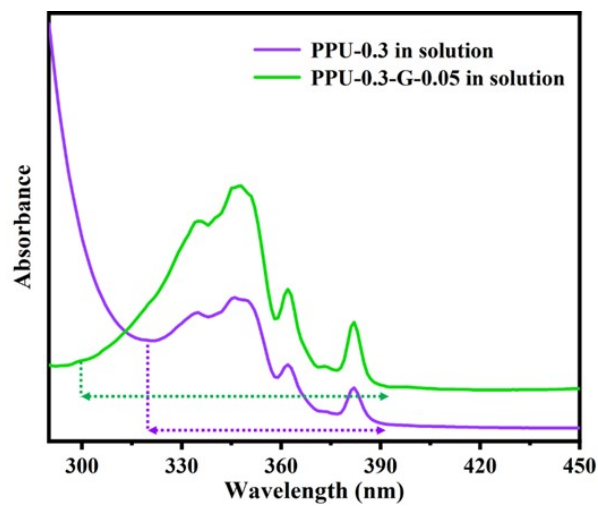

Figure S10. UV-vis absorption spectra of PPU-0.3 and PPU-0.3-G-0.05

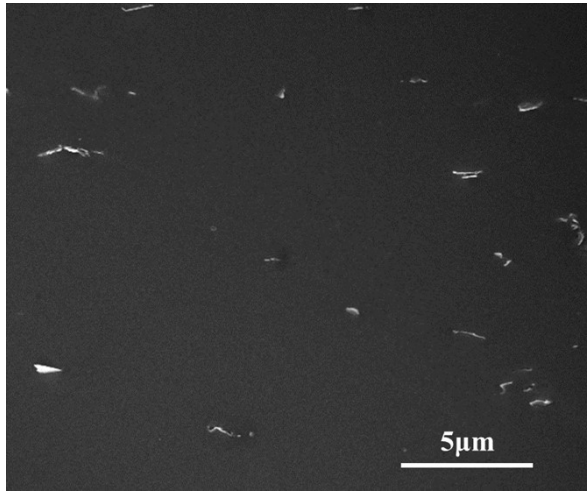

Figure S11. The SEM images of cold fracture of PPU-0.3-G-0.05

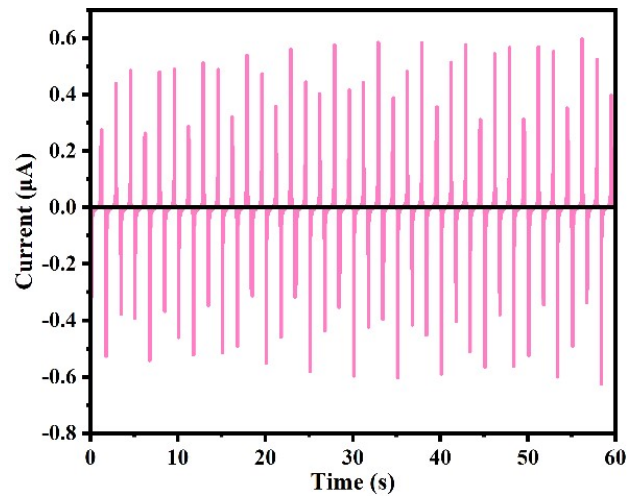

Figure S12. The short-circuit current of TENG
